# Supplementary material for: Effect of UV-C Irradiation and Lactic Acid Application on the Inactivation of Listeria monocytogenes and Lactic Acid Bacteria in Vacuum-Packaged Beef
Source: MDPI journal article supplement (doi:10.3390/foods10061217), 2021-05-28
Supplement: s1 [file s1]

**Table S1.** Central composite experimental design matrix with the L\*, a\* and b\* values recorded for beef samples.

| Runs | % Lactic acid<br>(m/v)<br>(X <sub>1</sub> ) | UV-C dose (mJ/cm <sup>2</sup> )<br>(X <sub>2</sub> ) | Lightness<br>(L*) <sup>a</sup> | Redness<br>(a*) <sup>a</sup> | Yellowness<br>(b*) <sup>a</sup> |
|------|---------------------------------------------|------------------------------------------------------|--------------------------------|------------------------------|---------------------------------|
| 1    | 2.5                                         | 398                                                  | 48.88                          | 16.74                        | 13.46                           |
| 2    | 0.0                                         | 165                                                  | 45.57                          | 23.12                        | 13.76                           |
| 3    | 2.5                                         | 0                                                    | 54.8                           | 14.42                        | 12.59                           |
| 4    | 2.5                                         | 0                                                    | 52.57                          | 15.35                        | 13.21                           |
| 5    | 2.5                                         | 165                                                  | 53.14                          | 13.18                        | 13.25                           |
| 6    | 5.0                                         | 330                                                  | 43.22                          | 10.13                        | 11.09                           |
| 7    | 5.0                                         | 330                                                  | 44.14                          | 9.89                         | 10.62                           |
| 8    | 5.0                                         | 0                                                    | 45.41                          | 11.74                        | 12.76                           |
| 9    | 2.5                                         | 165                                                  | 54.73                          | 12.49                        | 13.96                           |
| 10   | 0.0                                         | 0                                                    | 50.26                          | 17.97                        | 13.65                           |
| 11   | 2.5                                         | 165                                                  | 53.94                          | 12.85                        | 13.61                           |
| 12   | 2.5                                         | 398                                                  | 43.67                          | 15.95                        | 13.05                           |
| 13   | 0.0                                         | 165                                                  | 49.03                          | 21.23                        | 13.65                           |
| 14   | 6.0                                         | 165                                                  | 48.33                          | 10.09                        | 13.18                           |
| 15   | 0.0                                         | 0                                                    | 48.33                          | 19.23                        | 12.19                           |
| 16   | 5.0                                         | 0                                                    | 50.51                          | 10.59                        | 13.07                           |
| 17   | 2.5                                         | 165                                                  | 53.50                          | 12.92                        | 13.51                           |
| 18   | 6.0                                         | 165                                                  | 41.87                          | 12.25                        | 12.4                            |
| 19   | 0.0                                         | 330                                                  | 48.74                          | 20.64                        | 11.89                           |
| 20   | 0.0                                         | 330                                                  | 47.83                          | 19.66                        | 12.31                           |
| 21   | 2.5                                         | 165                                                  | 54.02                          | 13.03                        | 13.45                           |

<sup>a</sup> Mean of three values per sample.
